# Supplementary material for: Predicting cryptic links in host-parasite networks
Source: PubMed Central journal article supplement (PMC5466334; doi:10.1371/journal.pcbi.1005557), 2017-05-25

AUC

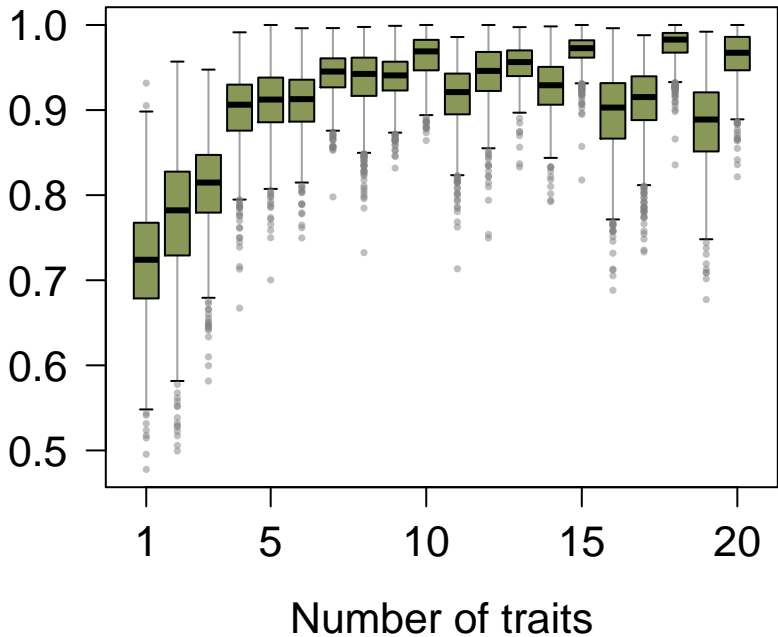

Supplement: pcbi.1005557.s006.pdf [file pcbi.1005557.s006.pdf]
